# Supplementary material for: Scavenger-Supported Photocatalytic Evidence of an Extended Type I Electronic Structure of the TiO2@Fe2O3 Interface
Source: PubMed Central journal article supplement (PMC9412959; doi:10.1021/acsami.2c06404), 2022-08-15
Supplement: am2c06404_si_001.pdf [file am2c06404_si_001.pdf]

## Supporting Information

For

# Scavenger-supported photocatalytic evidence of an extended type I electronic structure of TiO<sub>2</sub>@Fe<sub>2</sub>O<sub>3</sub> interface

*Anita Trenczek-Zajac<sup>\*1</sup>, Milena Synowiec<sup>\*1</sup>, Katarzyna Zakrzewska<sup>2</sup>, Karolina Zazakowny<sup>1</sup>, Kazimierz Kowalski<sup>3</sup>, Andrzej Dzedzic<sup>4</sup> and Marta Radecka<sup>1</sup>*

<sup>1</sup>Faculty of Materials Science and Ceramics, AGH University of Science and Technology, Krakow, Poland,

<sup>2</sup>Faculty of Computer Science, Electronics and Telecommunications, AGH University of Science and Technology, Krakow, Poland

<sup>3</sup>Faculty of Metals Engineering and Industrial Computer Science, AGH University of Science and Technology, Krakow, Poland

<sup>4</sup>Institute of Physics, College of Natural Sciences, University of Rzeszow, Rzeszow, Poland

**\*Corresponding author:**

[milsyn@agh.edu.pl](mailto:milsyn@agh.edu.pl), [anita.trenczek-zajac@agh.edu.pl](mailto:anita.trenczek-zajac@agh.edu.pl)

### KEYWORDS

TiO<sub>2</sub>, Fe<sub>2</sub>O<sub>3</sub>, heterostructures, band diagram, interface, electron transfer, photocatalysis

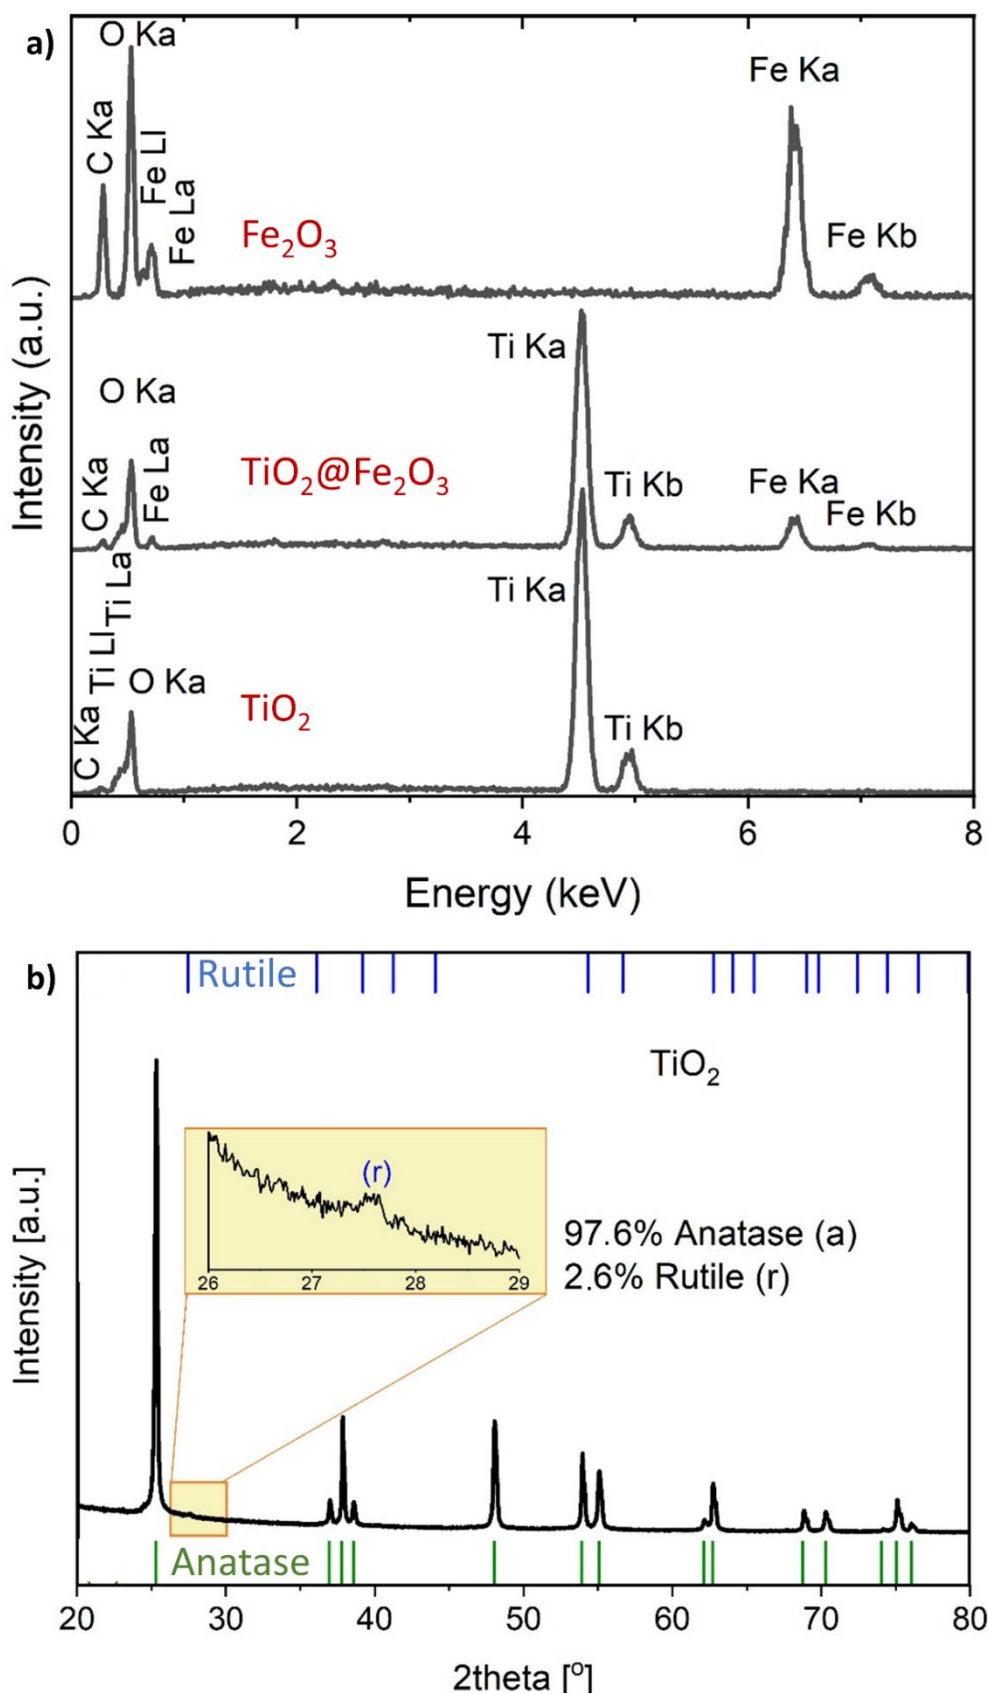

Figure S1. a) EDX spectrum of selected nanomaterials, b) X-ray diffraction pattern of  $\text{TiO}_2$  nanocrystals with traces of rutile.

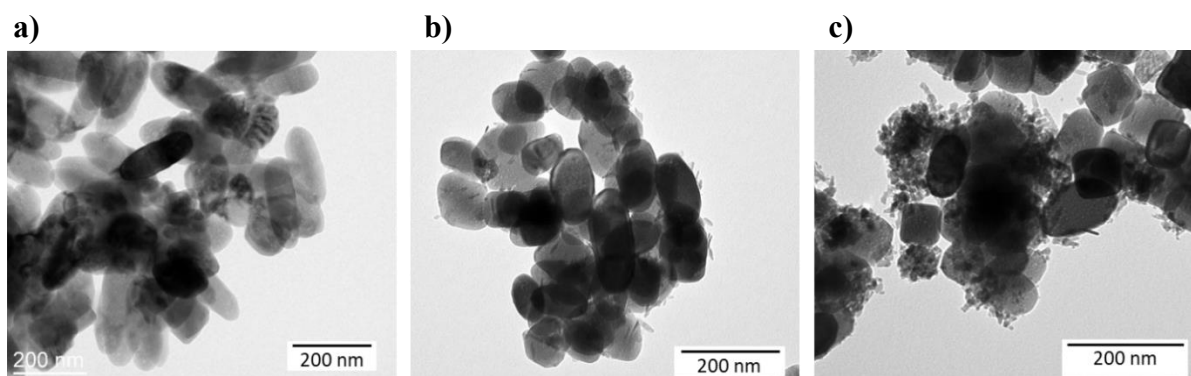

Figure S2. TEM images of a)  $\text{TiO}_2@2\%\text{Fe}_2\text{O}_3$ , b)  $\text{TiO}_2@10\%\text{Fe}_2\text{O}_3$ , c)  $\text{TiO}_2@20\%\text{Fe}_2\text{O}_3$ .

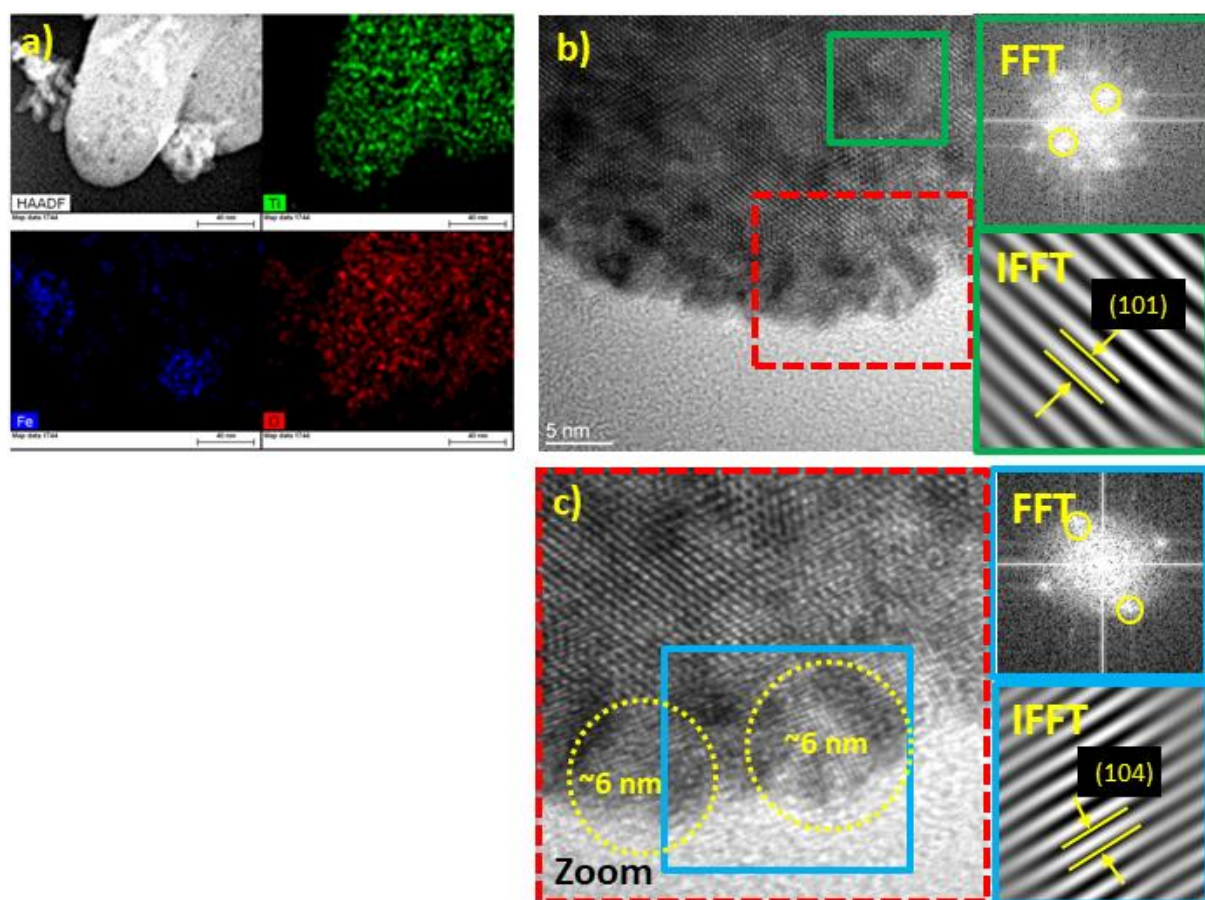

Figure S3.  $\text{TiO}_2@20\%\text{Fe}_2\text{O}_3$  sample a) EDX mapping images; b) HRTEM images with Fast Fourier Transform and IFFT analysis indicate the existence of (101) plane of anatase  $\text{TiO}_2$ ; c) FFT of the blue rectangle from the zoomed area shows hematite nanoparticles of 6 nm size with the (104) plane of  $\alpha\text{-Fe}_2\text{O}_3$ .

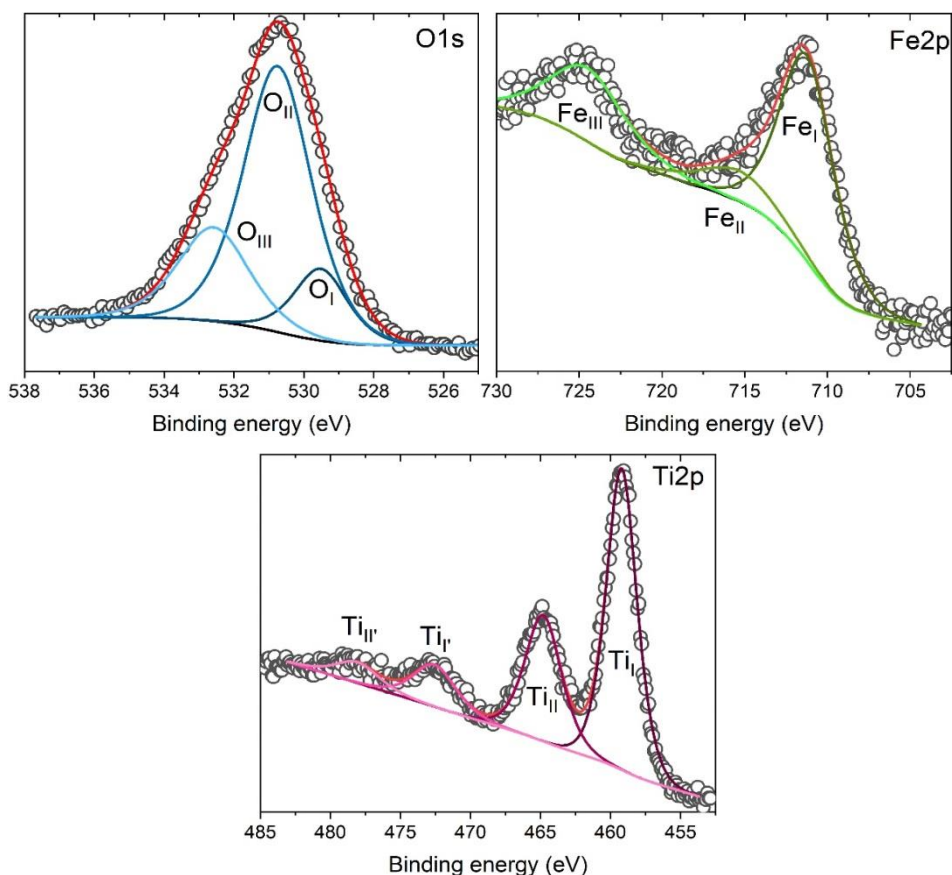

Figure S4. Deconvolution of the XPS spectra of O1s, Ti2p and Fe2p of TiO<sub>2</sub> nanocrystals heavily modified with Fe<sub>2</sub>O<sub>3</sub> (TiO<sub>2</sub>@20%Fe<sub>2</sub>O<sub>3</sub>).

Table S1. Characteristic binding energies of Ti2p, O1s, and Fe2p determined from XPS analysis for TiO<sub>2</sub> heavily modified with Fe<sub>2</sub>O<sub>3</sub> (TiO<sub>2</sub>@20%Fe<sub>2</sub>O<sub>3</sub>).

| Symbol            | Binding energy (eV) | Type of bonding                                                                       | Ref.  |
|-------------------|---------------------|---------------------------------------------------------------------------------------|-------|
| <b>Ti2p</b>       |                     |                                                                                       |       |
| Ti <sub>I</sub>   | 459.2(3)            | Ti2p <sub>3/2</sub> , O-Ti-O                                                          | [1]   |
| Ti <sub>II</sub>  | 464.9(3)            | Ti2p <sub>1/2</sub> , O-Ti-O                                                          | [1]   |
| Ti <sub>I'</sub>  | 472.7(3)            | satellite of Ti2p <sub>3/2</sub> , O-Ti-O                                             | [1]   |
| Ti <sub>II'</sub> | 478.3(3)            | satellite of Ti2p <sub>1/2</sub> , O-Ti-O                                             | [1]   |
| <b>O1s</b>        |                     |                                                                                       |       |
| O <sub>I</sub>    | 529.5(4)            | Ti-O-Ti                                                                               | [2]   |
| O <sub>II</sub>   | 530.8(4)            | oxygen vacancies or defects                                                           | [2]   |
| O <sub>III</sub>  | 532.8(4)            | chemisorbed species e.g. OH <sup>-</sup> , H <sub>2</sub> O, O <sup>2-</sup>          | [2]   |
| <b>Fe2p</b>       |                     |                                                                                       |       |
| Fe <sub>I</sub>   | 711.5(5)            | Fe2p <sub>3/2</sub> , Fe <sup>3+</sup> in Fe <sub>2</sub> O <sub>3</sub>              | [3–5] |
| Fe <sub>II</sub>  | 715.6(5)            | satellite of Fe2p <sub>3/2</sub> , Fe <sup>3+</sup> in Fe <sub>2</sub> O <sub>3</sub> | [3–5] |
| Fe <sub>III</sub> | 724.8(5)            | Fe2p <sub>1/2</sub> , Fe <sup>3+</sup> in Fe <sub>2</sub> O <sub>3</sub>              | [3–5] |

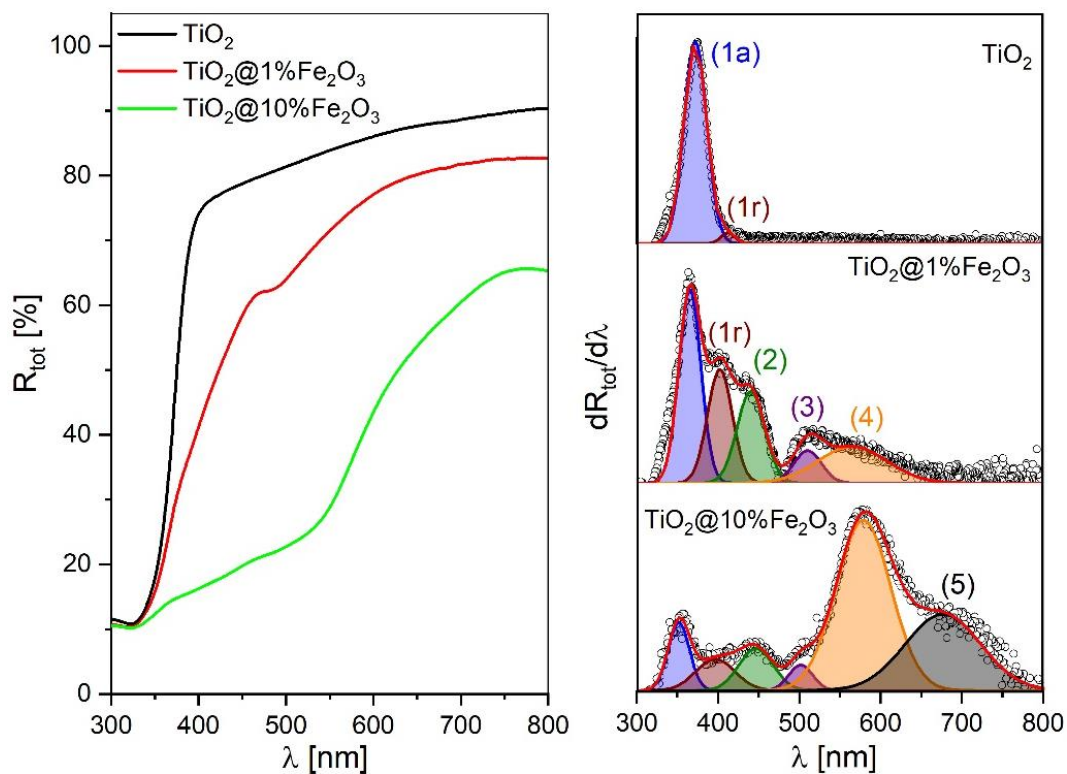

Figure S5. Spectral dependence of total reflectance (left-hand side) and first derivative spectra  $dR_{\text{tot}}/d\lambda$  (right-hand side) for  $\text{TiO}_2$  NCs before and after modification with  $\text{Fe}_2\text{O}_3$ .

Table S2. Energies of the optical transitions for  $\text{TiO}_2$  and  $\text{TiO}_2@Fe_2O_3$  nanomaterials obtained from the first derivative plot. **Transition energies were determined with an uncertainty of 0.02 eV.**

| Sample                          | (1a) (eV) | 1r (eV) | (2) (eV) | (3) (eV) | (4) (eV) | (5) (eV) |
|---------------------------------|-----------|---------|----------|----------|----------|----------|
| $(\text{TiO}_2)^*$              | 3.32      | -       | -        | -        | -        | -        |
| $\text{TiO}_2$                  | 3.34      | 3.04    |          |          |          |          |
| $(\text{TiO}_2@0.2\%Fe_2O_3)^*$ | 3.36      | -       | 3.02     | -        | -        | -        |
| $\text{TiO}_2@1\%Fe_2O_3$       | 3.40      | 3.08    | 2.82     | 2.43     | 2.19     | --       |
| $(\text{TiO}_2@2\%Fe_2O_3)^*$   | 3.43      | -       | 2.92     | 2.48     | 2.17     | 1.84     |
| $\text{TiO}_2@10\%Fe_2O_3$      | 3.54      | 3.14    | 2.79     | 2.48     | 2.15     | 1.84     |
| $(\text{TiO}_2@20\%Fe_2O_3)^*$  | 3.52      | -       | 2.81     | 2.48     | 2.13     | 1.81     |
| $Fe_2O_3$                       | -         | -       | -        | -        | 2.11     | 1.78     |

\* In this case,  $\text{TiO}_2$  nanocrystals appears only as anatase phase.

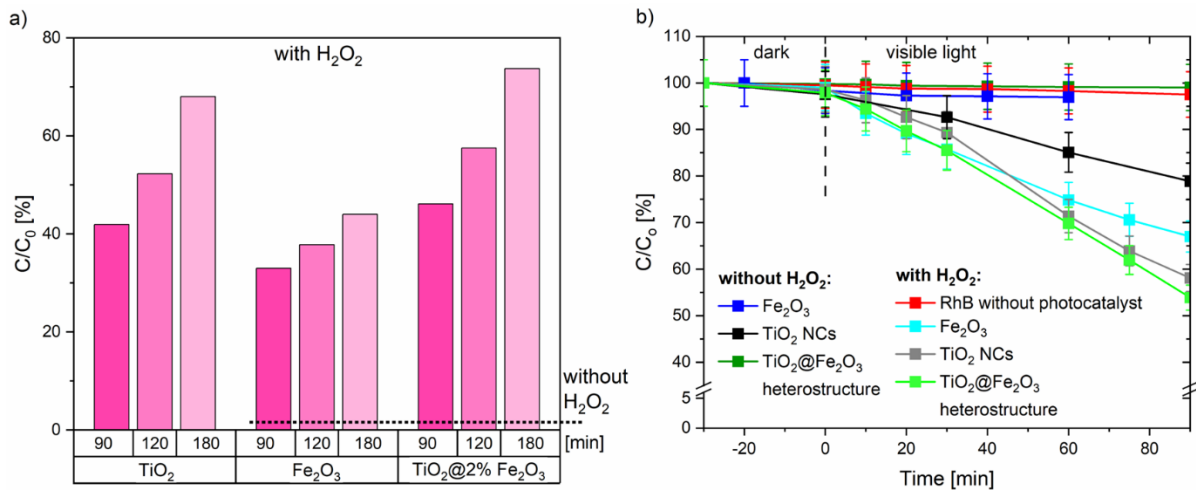

Figure S6. (a) Photocatalytic decomposition of RhB dye under visible radiation for pure oxides vs. TiO<sub>2</sub>@2%Fe<sub>2</sub>O<sub>3</sub> heterojunction, (b) comparison of photocatalytic activity with and without addition of H<sub>2</sub>O<sub>2</sub> to the photocatalytic system.

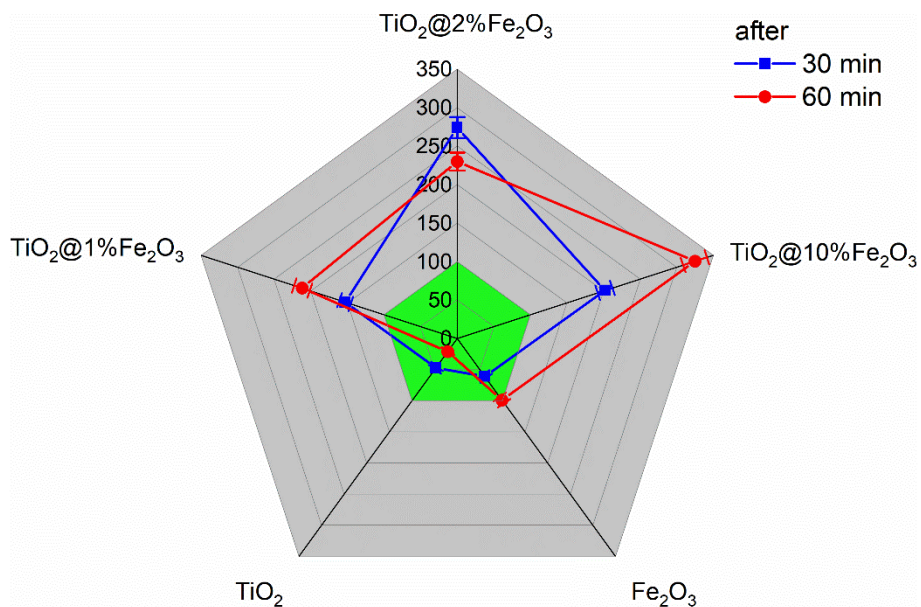

Figure S7. Normalized dye degradation after 30 and 60 min, in the presence of scavenger of holes.

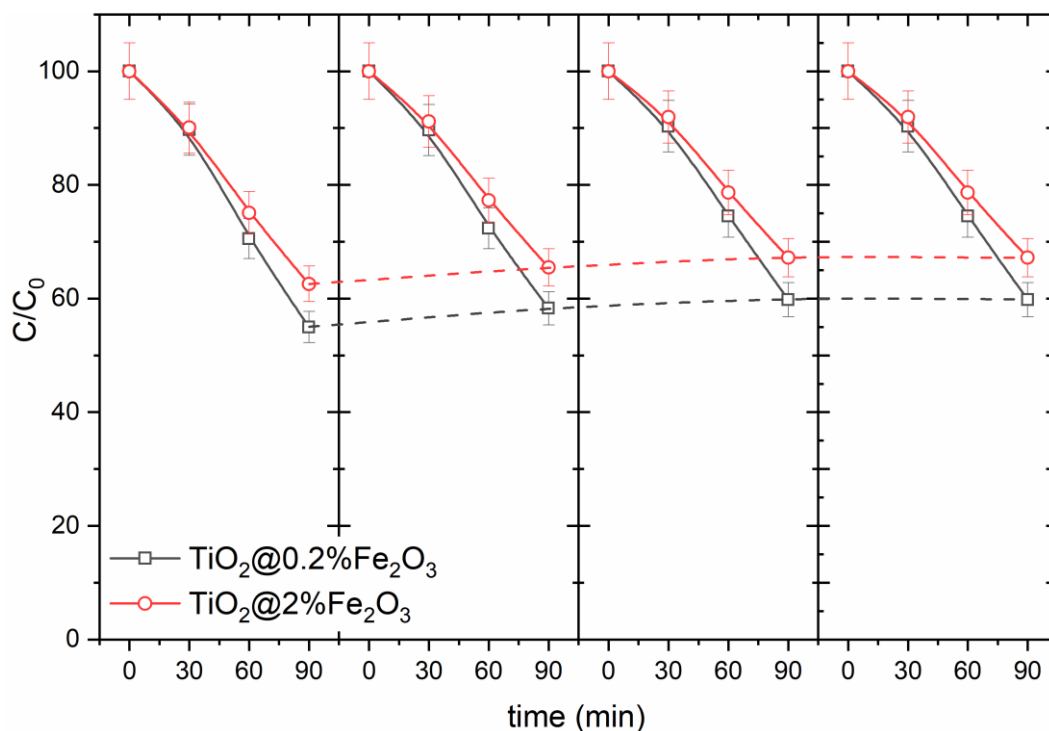

Figure S8. Recycled photocatalytic process of Rhodamine B in the presence of  $\text{TiO}_2@\text{Fe}_2\text{O}_3$  and  $\text{H}_2\text{O}_2$ .

## References

1. Saha, N.C.; Tompkins, H.G. Titanium Nitride Oxidation Chemistry: An X-ray Photoelectron Spectroscopy Study. *J. Appl. Phys.* **1992**, *72*, 3072–3079, doi:10.1063/1.351465.
2. Ghobadi, A.; Ulusoy, T.G.; Garifullin, R.; Guler, M.O.; Okyay, A.K. A Heterojunction Design of Single Layer Hole Tunneling ZnO Passivation Wrapping around TiO<sub>2</sub> Nanowires for Superior Photocatalytic Performance. *Sci. Rep.* **2016**, *6*, 30587, doi:10.1038/srep30587.
3. Bajnóczi, É.G.; Balázs, N.; Mogyorósi, K.; Srankó, D.F.; Pap, Z.; Ambrus, Z.; Canton, S.E.; Norén, K.; Kuzmann, E.; Vértes, A.; et al. The Influence of the Local Structure of Fe(III) on the Photocatalytic Activity of Doped TiO<sub>2</sub> Photocatalysts—An EXAFS, XPS and Mössbauer Spectroscopic Study. *Appl. Catal. B Environ.* **2011**, *103*, 232–239, doi:10.1016/j.apcatb.2011.01.033.
4. Yamashita, T.; Hayes, P. Analysis of XPS Spectra of Fe<sup>2+</sup> and Fe<sup>3+</sup> Ions in Oxide Materials. *Appl. Surf. Sci.* **2008**, *254*, 2441–2449, doi:10.1016/j.apsusc.2007.09.063.
5. Moradi, V.; Jun, M.B.G.; Blackburn, A.; Herring, R.A. Significant Improvement in Visible Light Photocatalytic Activity of Fe Doped TiO<sub>2</sub> Using an Acid Treatment Process. *Appl. Surf. Sci.* **2018**, *427*, 791–799, doi:10.1016/j.apsusc.2017.09.017.
